# Supplementary material for: Effect of natural organic matter on dissolution and toxicity of sulfidized silver nanoparticles to Caenorhabditis elegans
Source: Royal Society of Chemistry journal article supplement (doi:10.1039/c6en00095a), 2016-01-01
Supplement: c6en00095a1.pdf [file c6en00095a1.pdf]

Supporting information

Effect of natural organic matter on dissolution and toxicity of sulfidized silver nanoparticles to *Caenorhabditis elegans*.

Blanche Collin,\* Olga V. Tsyusko, Daniel Starnes and Jason M. Unrine\*

University of Kentucky, Department of Plant and Soil Sciences, Lexington Kentucky  
40546, United States

[\\*collin.blanche@gmail.com](mailto:collin.blanche@gmail.com), [jason.unrine@uky.edu](mailto:jason.unrine@uky.edu)

### **Supplemental characterization particle methods**

We performed powder X-ray diffraction (XRD) on dried samples using a PANalytical X'pert powder X-ray diffractometer (Almelo, The Netherlands). The instrument is equipped with a Cu anode X-ray source. Data were collected from 5 to 70° 2theta with 0.02° steps. Ultraviolet-visible spectroscopy was performed using a Carey Bio 50 spectrophotometer over the range of 300-600 nm in steps of 1 nm.

Table SII - Characterization of the fulvic acids, data from International Humic Substances Society (IHSS) and C(%) and S(%) measured in the stock solution.

| Reference                    |        | Data given by IHSS in %(w/w) |      |      |      |      |      |      |       | Measured data* |      |
|------------------------------|--------|------------------------------|------|------|------|------|------|------|-------|----------------|------|
|                              |        | H <sub>2</sub> O             | Ash  | C    | H    | O    | N    | S    | P     | C              | S    |
| Suwannee River I fulvic acid | 1S101F | 8.8                          | 0.46 | 52.4 | 4.31 | 42.2 | 0.72 | 0.44 | <0.01 | 50.4           | 0.48 |
| Pahoee Peat II fulvic acid   | 2S103F | 9.3                          | 0.9  | 51.3 | 3.53 | 43.3 | 2.34 | 0.76 | <0.01 | 44.9           | 0.63 |
| Pony Lake fulvic acid        | 1R109F | 4.32                         | 1.25 | 52.5 | 5.39 | 31.4 | 6.51 | 3.03 | 0.55  | 44.7           | 2.6  |

\* data measured in H<sub>2</sub>O after a 0.2μm filtration

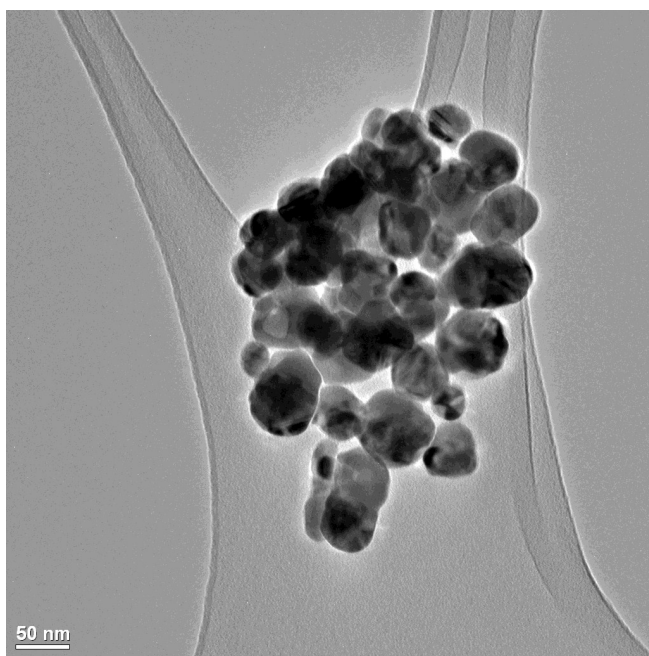

Figure SII- Example of transmission electron micrographs of sulfidized AgNPs

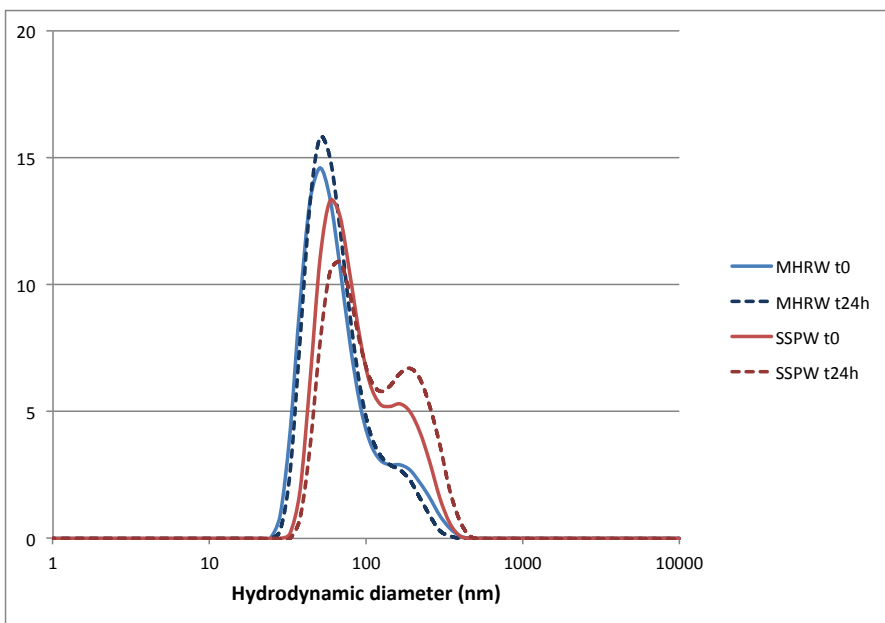

Figure SI2. Volume-weighted distribution of the hydrodynamic diameters of sulfidized AgNPs in two media: moderately hard reconstituted water (MHRW) and simulated soil pore water (SSPW)

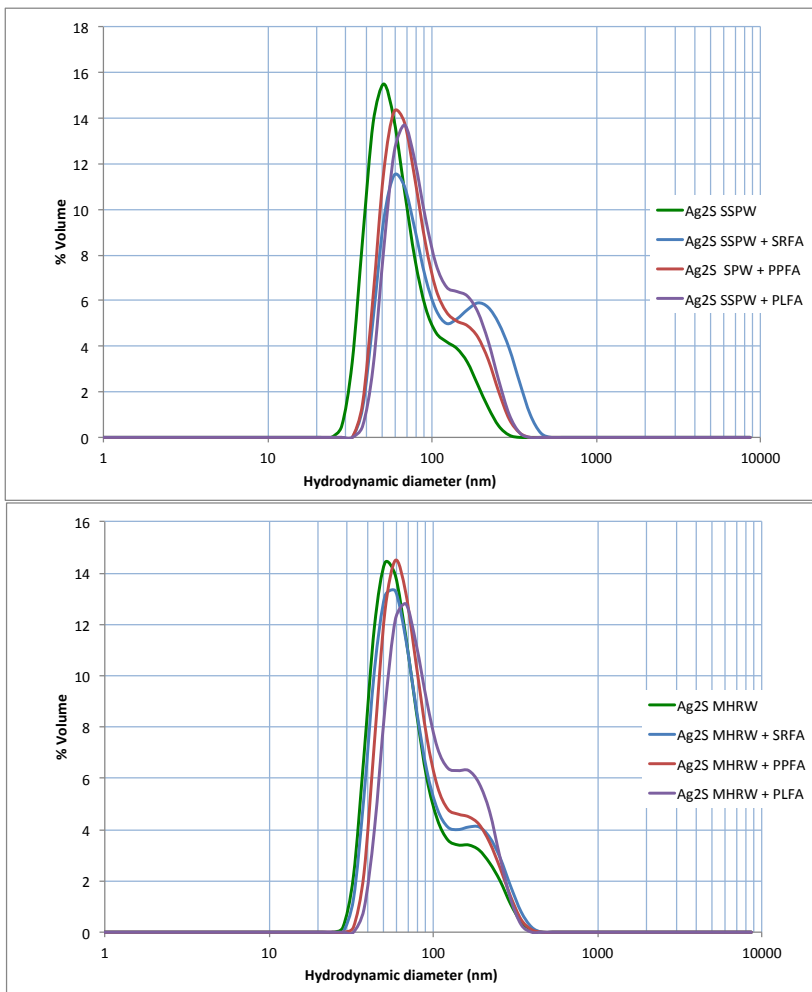

Figure SI 3 - Volume-weighted distribution of the hydrodynamic diameters of 15 mg Ag L<sup>-1</sup> Ag<sub>2</sub>S in simulated soil pore water (SSPW) and moderately hard reconstituted water (MHRW) with 0 and 40 mg C L<sup>-1</sup> of Suwannee river fulvic acid (SRFA), Pahokee peat fulvic acid (PPFA) and pony lake fulvic acid (PLFA)

Table SI 2 Greenhouse-Geisser test for the effect of time on Ag dissolution

| Greenhouse-Geisser | Type III Sum of Squares | df    | Mean Square | F     | p     | ρ <sub>η</sub> |
|--------------------|-------------------------|-------|-------------|-------|-------|----------------|
| MHRW               | 211                     | 1.003 | 211         | 1.4   | 0.356 | 0.414          |
| MHRW + SRFA        | 369                     | 1     | 368         | 165.1 | 0.006 | 0.988          |
| MHRW + PPFA        | 351                     | 1.217 | 289         | 142.1 | 0.003 | 0.986          |
| MHRW + PLFA        | 25708                   | 1.013 | 25390       | 75.8  | 0.012 | 0.974          |
| SSPW               | 51                      | 1.151 | 44          | 1.5   | 0.347 | 0.423          |
| SSPW + SRFA        | 344                     | 1.012 | 340         | 358.6 | 0.003 | 0.994          |
| SSPW + PPFA        | 258                     | 1.097 | 235         | 740.3 | 0.001 | 0.997          |
| SSPW + PLFA        | 29398                   | 1.044 | 28163       | 416.5 | 0.002 | 0.995          |

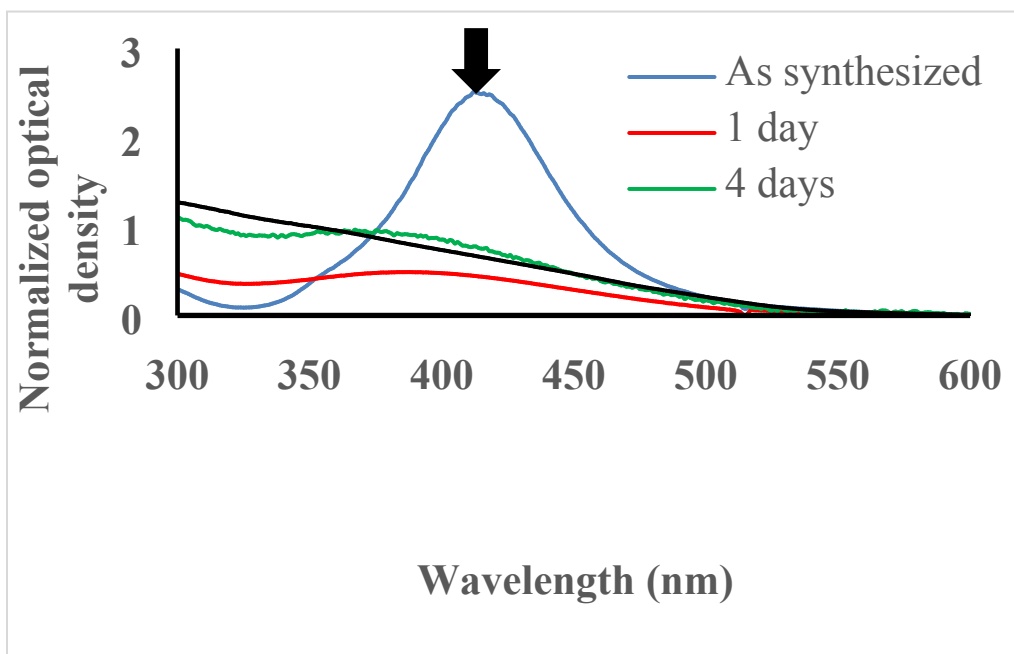

Figure SI4. Ultraviolet-visible spectra of as-synthesized silver nanoparticles (Ag NPs), and Ag NPs incubated in a solution containing 1:2 molar ratio of Ag to  $\text{Na}_2\text{S}$  for either 1, 4 or 7 days. The black arrow indicates the position of the initial surface plasmon peak.

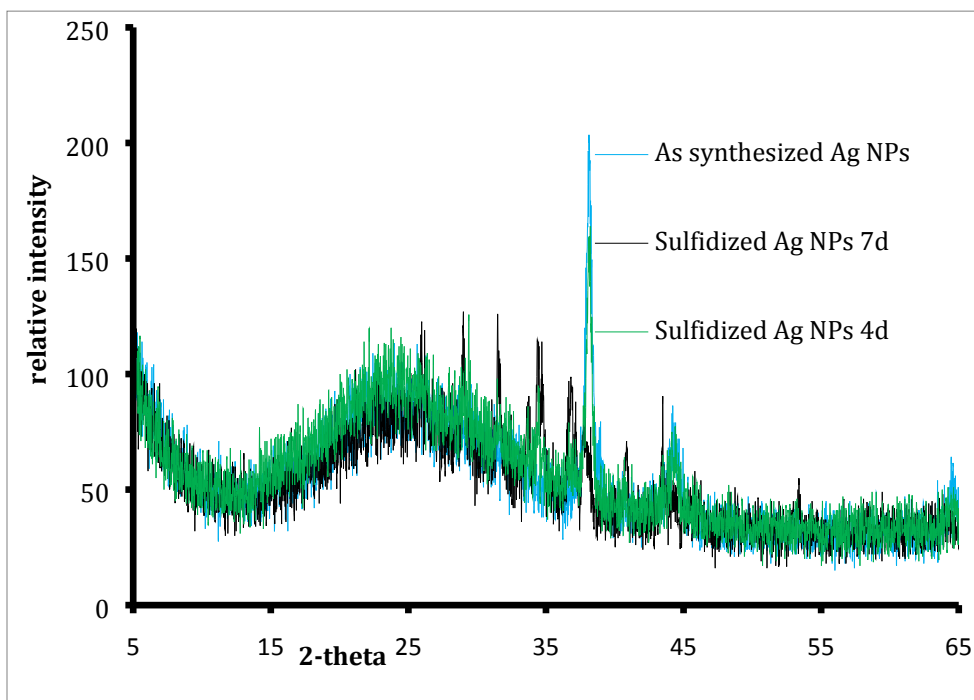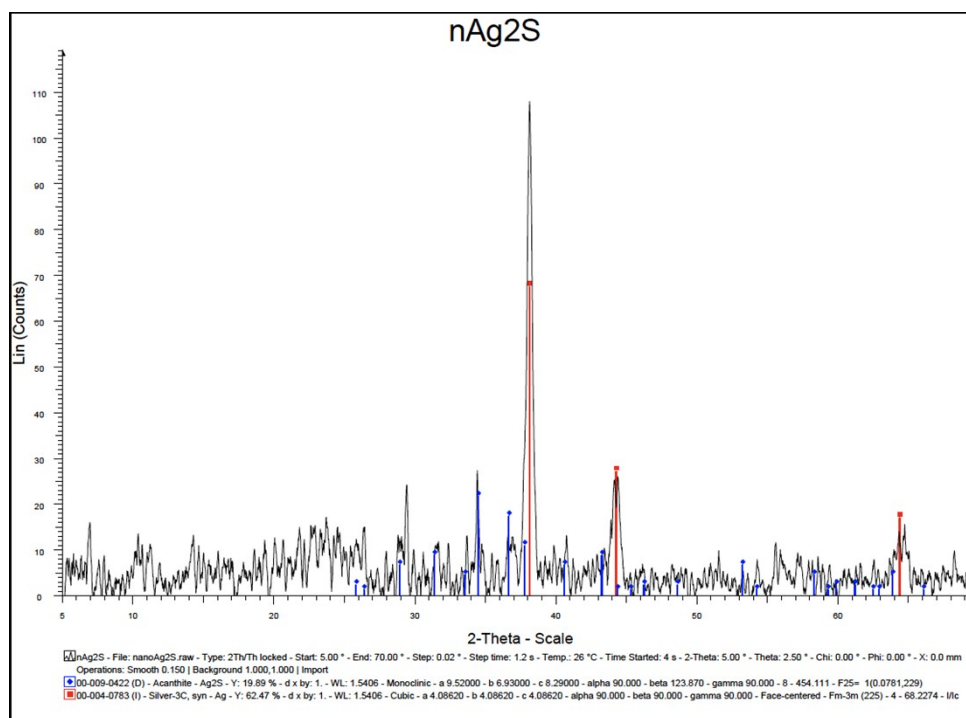

Figure SI5. Powder X-ray diffractograms for as-synthesized silver nanoparticles (Ag NPs) and Ag NPs incubated in a solution containing 1:2 molar ratio of Ag to Na<sub>2</sub>S for either 4 or 7 days (top) and background subtracted diffractogram of Ag NPs incubated for 4 days with positions of Ag(0) (cubic; red) and Ag<sub>2</sub>S (acanthite; blue) indicated.
